# Supplementary material for: Diagnostic accuracy of point-of-care lung ultrasound in COVID-19
Source: HighWire-hosted journal article supplement (doi:10.1136/emermed-2020-210125), 2020-11-18
Supplement: emermed-2020-210125supp002_data_supplement.pdf [file emermed-2020-210125supp002_data_supplement.pdf]

**Supplementary table 1.** Outcome of POCUS of both PCR and CT COVID-19 positive and negative patients.

|                                | <b>PCR or CT COVID-19 positive</b> | <b>PCR or CT COVID-19 negative</b> | <b>Total</b> |
|--------------------------------|------------------------------------|------------------------------------|--------------|
| <b>POCUS COVID-19 positive</b> | 24                                 | 27                                 | 51           |
| <b>POCUS COVID-19 negative</b> | 3                                  | 39                                 | 42           |
| <b>Total</b>                   | 27                                 | 66                                 | 93           |

POCUS = point-of care ultrasound; CT = computed tomography; PCR = polymerase chain reaction.
