# Supplementary material for: Diagnostic accuracy of point-of-care lung ultrasound in COVID-19
Source: HighWire-hosted journal article supplement (doi:10.1136/emermed-2020-210125), 2020-11-18
Supplement: emermed-2020-210125supp003_data_supplement.pdf [file emermed-2020-210125supp003_data_supplement.pdf]

**Supplementary table 2.** Reported symptoms of patients diagnosed both COVID-19 positive and negative by PCR or CT scanning.

| Reported symptoms   | PCR or CT COVID-19 negative (n,%) | PCR or CT COVID-19 positive (n,%) | Total missing data |
|---------------------|-----------------------------------|-----------------------------------|--------------------|
| Malaise             | 14 (61%)                          | 15 (83%)                          | 52                 |
| Fatigue             | 14 (56%)                          | 14 (70%)                          | 48                 |
| Fever*              | 15 (34%)                          | 18 (78%)                          | 26                 |
| Headache            | 7 (27%)                           | 7 (35%)                           | 47                 |
| Rhinorrhoea         | 6 (21%)                           | 1 (6%)                            | 47                 |
| Sore throat         | 4 (14%)                           | 2 (10%)                           | 45                 |
| Coughing            | 33 (57%)                          | 19 (73%)                          | 9                  |
| Sputum production   | 9 (20%)                           | 4 (17%)                           | 25                 |
| Dyspnoea            | 32 (55%)                          | 18 (67%)                          | 8                  |
| Pain with breathing | 6 (18%)                           | 2 (11%)                           | 40                 |
| Haemoptysis         | 2 (7%)                            | 0                                 | 45                 |
| Orthopnea           | 1 (4%)                            | 3 (16%)                           | 46                 |
| Palpitations        | 6 (14%)                           | 0                                 | 27                 |
| Chest pain*         | 20 (36%)                          | 3 (12%)                           | 11                 |
| Anorexia*           | 19 (56%)                          | 19 (86%)                          | 37                 |
| Nausea              | 9 (21%)                           | 7 (29%)                           | 26                 |
| Vomiting            | 11 (24%)                          | 4 (18%)                           | 26                 |
| Abdominal pain      | 10 (24%)                          | 3 (13%)                           | 29                 |
| Diarrhoea           | 11 (24%)                          | 11 (46%)                          | 23                 |
| Anosmia             | 0                                 | 6 (75%)                           | 84                 |
| <b>Total</b>        | <b>66 (71%)</b>                   | <b>27 (29%)</b>                   |                    |

Percentages are calculated from the total within that group minus the missing data.

CT = computed tomography; n = number; PCR = polymerase chain reaction. \*p <0,05.
