# Supplementary material for: Diagnostic accuracy of point-of-care lung ultrasound in COVID-19
Source: HighWire-hosted journal article supplement (doi:10.1136/emermed-2020-210125), 2020-11-18
Supplement: emermed-2020-210125supp004_data_supplement.pdf [file emermed-2020-210125supp004_data_supplement.pdf]

**Supplementary table 3.** Outcome of POCUS in both PCR and CT COVID-19 positive and negative patients without cardiopulmonary disease.

|                                | PCR or CT COVID-19 positive | PCR or CT COVID-19 negative | Total |
|--------------------------------|-----------------------------|-----------------------------|-------|
| <b>POCUS COVID-19 positive</b> | 12                          | 6                           | 18    |
| <b>POCUS COVID-19 negative</b> | 0                           | 19                          | 19    |
| <b>Total</b>                   | 12                          | 25                          | 37    |

POCUS = point-of care ultrasound; CT = computed tomography; PCR = polymerase chain reaction.
